# Supplementary material for: Bio-friendly Maillard reaction fluorescent products from glutathione and ascorbic acid for the rapid and label-free detection of Fe3+in living cells
Source: Royal Society of Chemistry journal article supplement (doi:10.1039/c6tb02449a), 2016-12-17
Supplement: c6tb02449a1.pdf [file c6tb02449a1.pdf]

## Supporting Materials

### **Bio-friendly Maillard reaction fluorescent products from glutathione and ascorbic acid for rapid and label-free detection of Fe<sup>3+</sup> in living cell**

Jiang Xue Dong,<sup>a</sup> Zi Li Wang,<sup>b</sup> Yue Yang,<sup>b</sup> Zhong Feng Gao,<sup>a</sup> Bang Lin Li,<sup>a</sup> Hui Hui Jiang,<sup>b</sup> Nian Bing Li<sup>\*a</sup> and Hong Qun Luo<sup>\*a</sup>

<sup>a</sup> Key Laboratory of Eco-environments in Three Gorges Reservoir Region (Ministry of Education), School of Chemistry and Chemical Engineering, Southwest University, Chongqing 400715, People's Republic of China

<sup>b</sup> College of Animal Science and Technology, Southwest University, Chongqing 400715, People's Republic of China

---

\* Corresponding authors. Tel: +86 23 68253237; fax: +86 23 68253237.

E-mail addresses: linb@swu.edu.cn (N.B. Li); luohq@swu.edu.cn (H.Q. Luo).

## Contents

|                                                                                                 |    |
|-------------------------------------------------------------------------------------------------|----|
| Calculation of cell viability.....                                                              | S3 |
| Photographs of purified MRFPs solids (Fig. S1).....                                             | S4 |
| FT-IR spectrum of the purified MRFPs (Fig. S2).....                                             | S5 |
| Fluorescence response of MRFPs to various concentrations of $\text{Cu}^{2+}$ (Fig. S3).....     | S6 |
| Effect of reaction time on the $\text{Fe}^{3+}$ sensor (Fig. S4).....                           | S7 |
| Change of intracellular fluorescence emission after addition of $\text{Fe}^{3+}$ (Fig. S5)..... | S8 |
| Video legend.....                                                                               | S9 |

Calculation of cell viability:

The cell viability was calculated according to the following equation:

$$\text{cell viability (\%)} = [\Sigma (A_i / A_0 \times 100)] / n \quad (1)$$

where  $A_i$  is the absorbance at 450 nm in the presence of different concentrations of the MRFPs (0.1, 2.5, 5, 10, 50, 100, 250, 500, and 1000  $\mu\text{g mL}^{-1}$ ),  $A_0$  is the average absorbance at 450 nm in the absence of MRFPs in the culture medium, and  $n$  ( $n = 8$ ) is the number of the data point.

The cell viability was calculated to be 100 % in the absence of MRFPs in the culture medium. We can assess the cytotoxicity by comparing the cell viability of the cells in the presence and absence of the MRFPs in the culture medium under experimental conditions. If the cell viability is below 100 % in the presence of the MRFPs, the MRFPs is cytotoxic; otherwise, the MRFPs is non-cytotoxic, indicating that the MRFPs can be used as bioimaging probes in living cells and have no effect on the normal metabolic processes of cells.

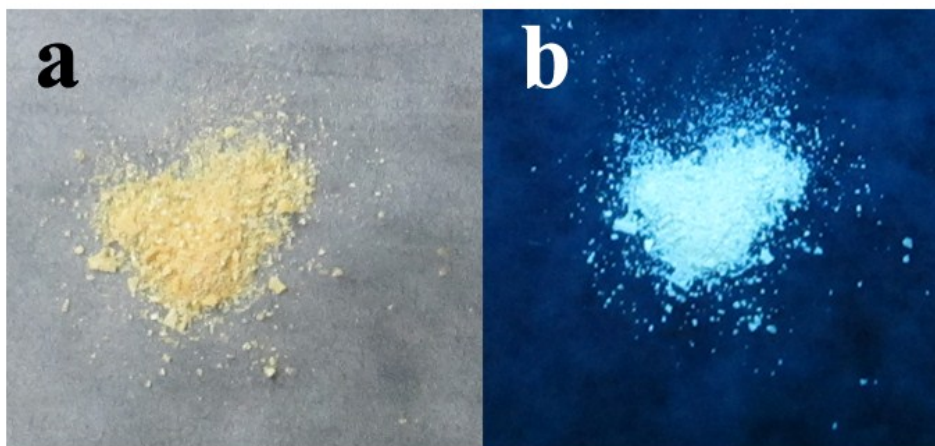

**Fig. S1** Photographs of purified MRFPs solids under visible light (a) and UV light (b), respectively.

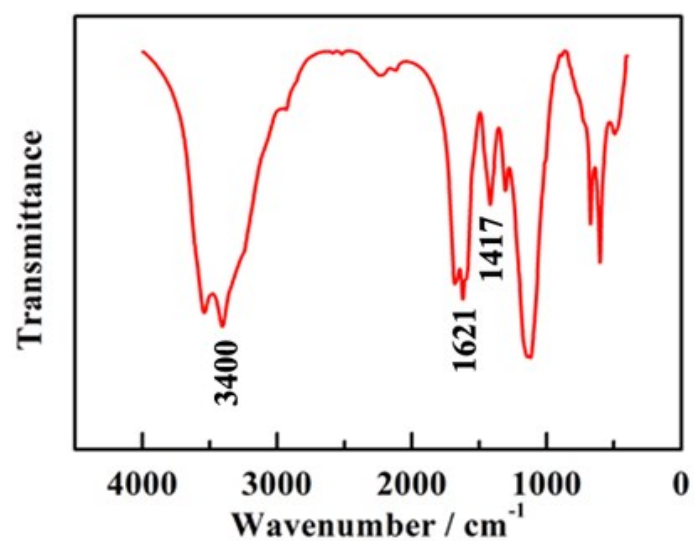

**Fig. S2** FT-IR spectrum of the purified MRFPs.

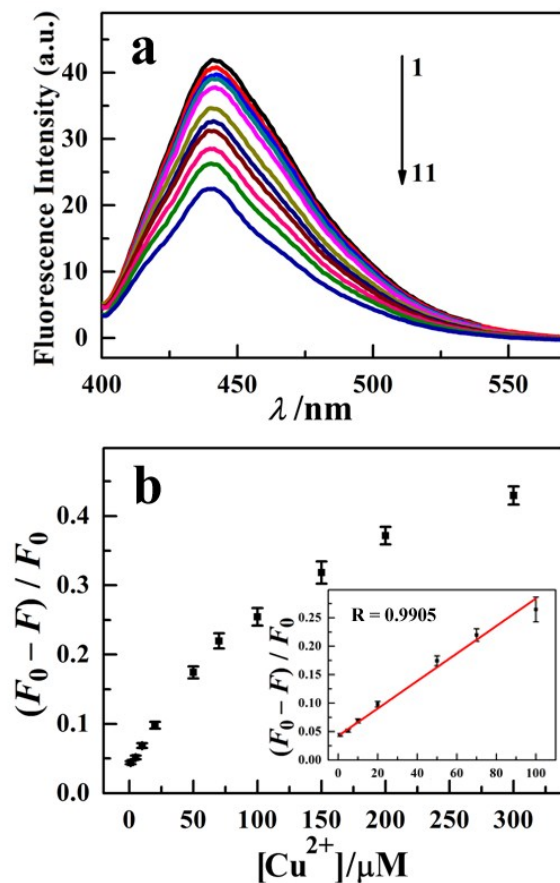

**Fig. S3** (a) Fluorescence spectra of the MRFPs in the presence of various concentrations of  $\text{Cu}^{2+}$  (no.1-11: 0, 1, 5, 10, 20, 50, 70, 100, 150, 200, 300  $\mu\text{M}$ ). (b) Corresponding plot of the values of  $((F - F_0) / F_0)$  at 450 nm versus the concentrations of  $\text{Cu}^{2+}$ . Concentration of MRFPs is 0.02  $\text{mg mL}^{-1}$ .

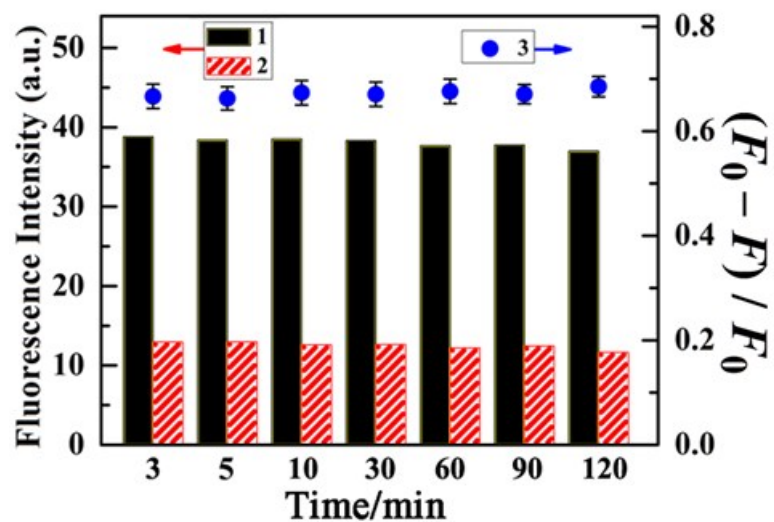

**Fig. S4** Effect of reaction time of the system for detecting  $\text{Fe}^{3+}$ . Histogram represents the fluorescence intensity of reaction solutions in the absence (black, no. 1) and presence (red, no. 2) of  $\text{Fe}^{3+}$ . Scatter plot is the  $((F - F_0) / F_0)$  (no. 3). Concentration of MRFPs is  $0.02 \text{ mg mL}^{-1}$ .

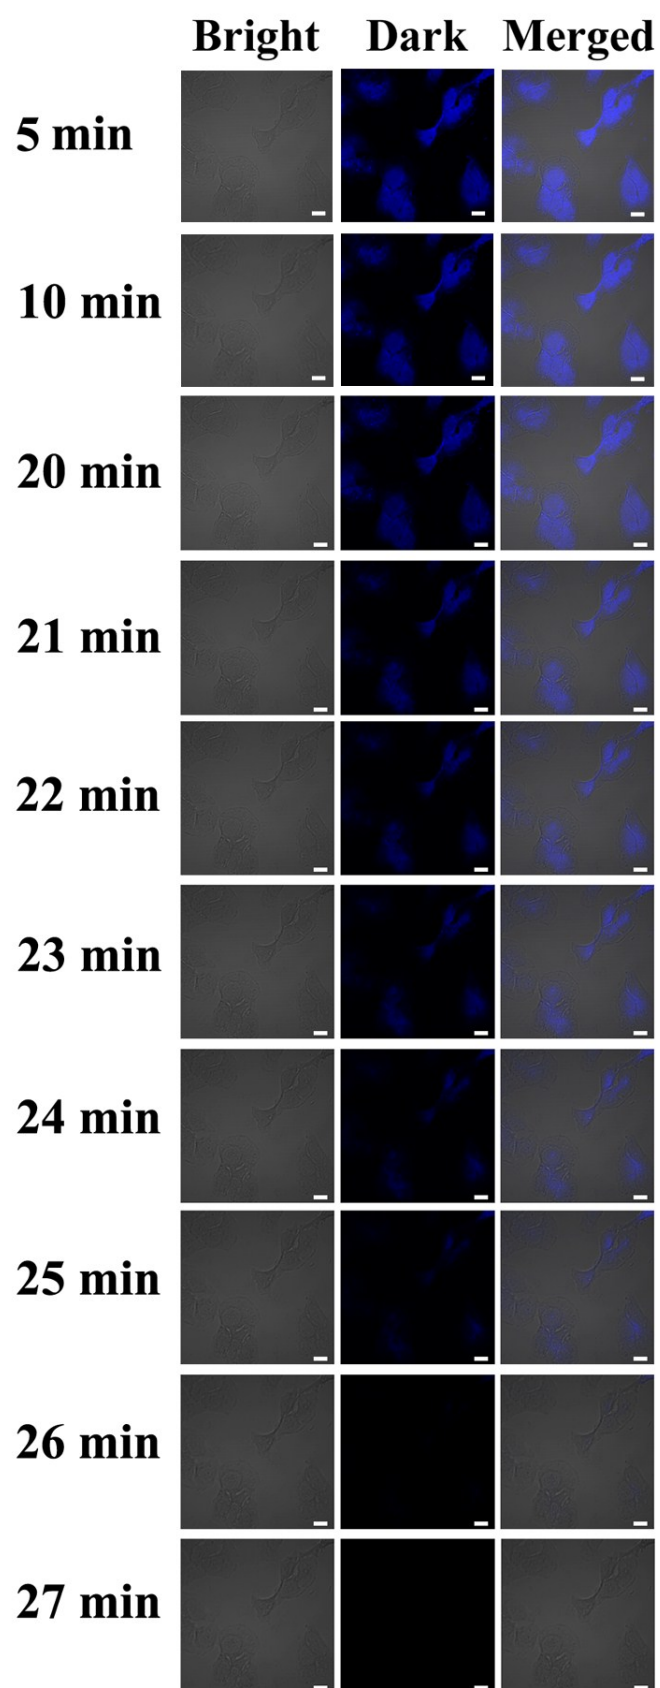

**Fig. S5** Change of intracellular fluorescence emission over time after addition of  $\text{Fe}^{3+}$  to the culture medium. Concentrations of MRFPs and  $\text{Fe}^{3+}$  are  $1 \text{ mg mL}^{-1}$  and  $10 \text{ mM}$ , respectively. Scale bar is  $10 \text{ }\mu\text{m}$ .



### **Video legend**

The process of the fluorescence quenching of MRFPs by  $\text{Fe}^{3+}$
